# Supplementary material
Source: ML conference proceedings conference paper supplement (https://openaccess.thecvf.com/content/CVPR2021/html/Nauta_Neural_Prototype_Trees_CVPR_2021_paper.html)
Supplement: Supplementary file 5 [file Nauta_Neural_Prototype_Trees_CVPR_2021_supplemental.zip]

Archive with 5 entries (5 files):
- 05419-supp.pdf
- full_visualized_trees/README.txt
- full_visualized_trees/treevis_cars_h11_compressed.pdf
- full_visualized_trees/treevis_cub_h8.pdf
- full_visualized_trees/treevis_cub_h8_compressed.pdf
