# Supplementary material
Source: ML conference proceedings conference paper supplement (https://openaccess.thecvf.com/content/CVPR2021/html/Nauta_Neural_Prototype_Trees_CVPR_2021_paper.html)
Supplement: Supplementary file 5 [file Nauta_Neural_Prototype_Trees_CVPR_2021_supplemental.zip › full_visualized_trees/README.txt]

This folder contains one fully visualized ProtoTree for CUB (h = 8) and one for CARS (h = 11). 

PLEASE NOTE: Adobe Acrobat might not be able to open the pdf since the document is relatively large. Please use the compressed version (_compressed.pdf), or open the original pdf in e.g. Apple Preview or Google Chrome. The non-compressed ProtoTree for CARS is not included due to maximum file size constraints.
